# Supplementary material for: C-terminal motif prediction in eukaryotic proteomes using comparative genomics and statistical over-representation across protein families
Source: PubMed Central journal article supplement (PMC1929074; doi:10.1186/1471-2164-8-191), 2007-06-26

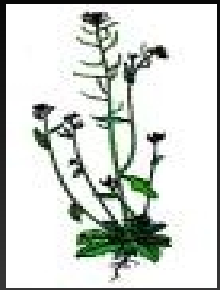

GO  
annotation  
for  
DSD-cooh  
proteins

### Functional Categorization by Annotations for : GO Cellular Component

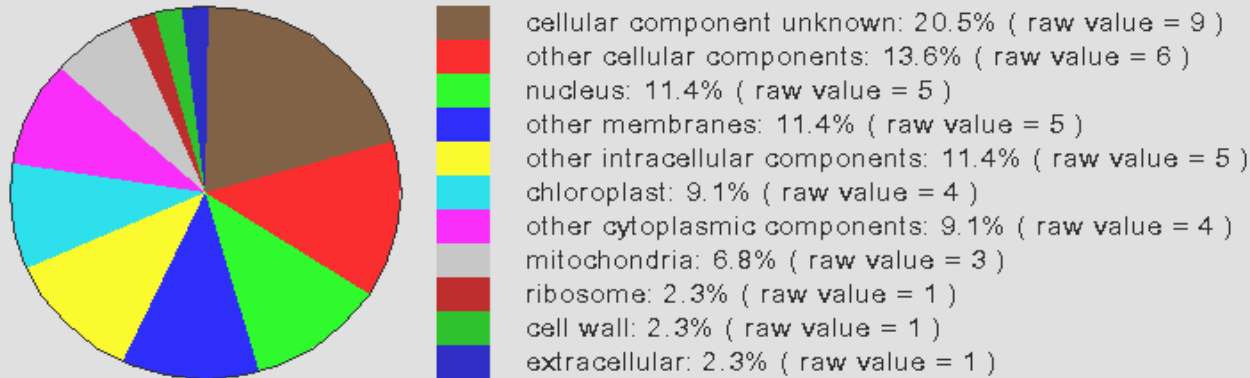

### Functional Categorization by Annotations for : GO Molecular Function

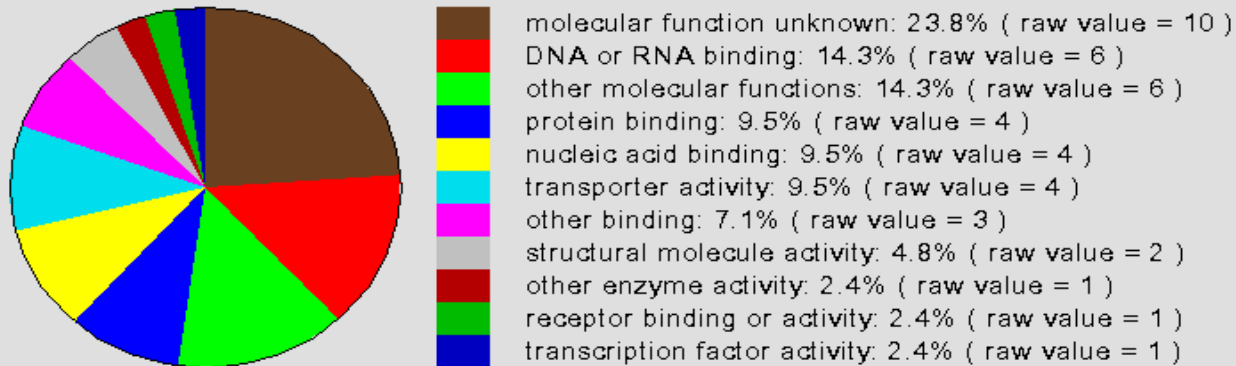

### Functional Categorization by Annotations for : GO Biological Process

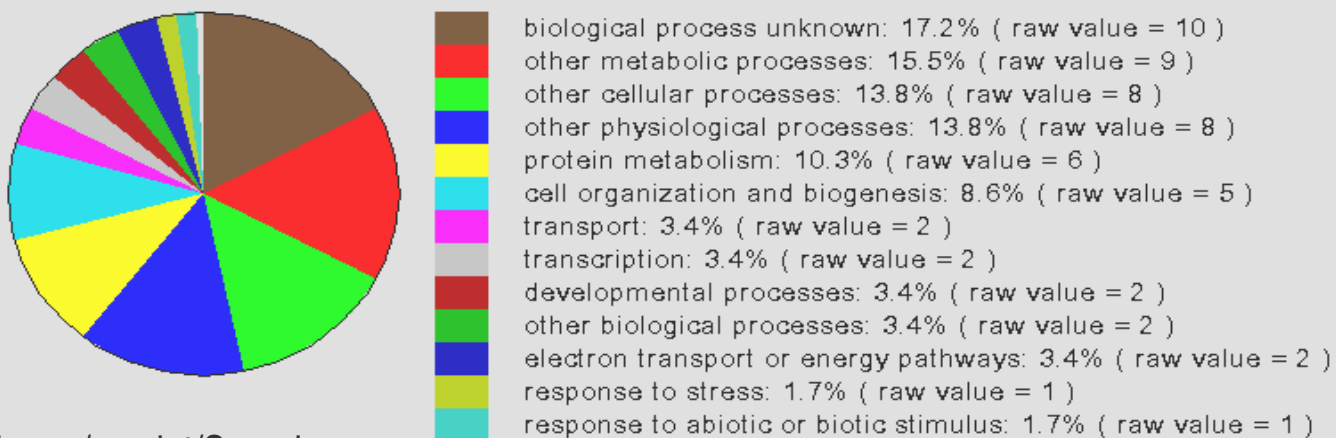

Supplement: 1471-2164-8-191-S3.pdf [file 1471-2164-8-191-S3.pdf]
