# Supplementary material for: C-terminal motif prediction in eukaryotic proteomes using comparative genomics and statistical over-representation across protein families
Source: PubMed Central journal article supplement (PMC1929074; doi:10.1186/1471-2164-8-191), 2007-06-26

# C-terminal fusion of SDSDSD peptide to EGFP in *A.thaliana*

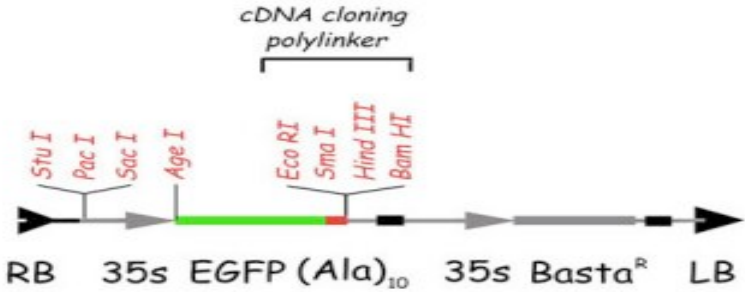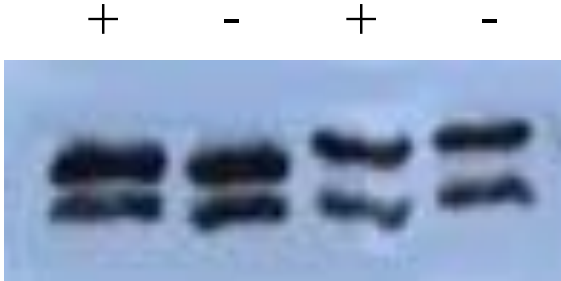

EGFP: EGFP MCS (14 residues) -cooh

EGFP:SD3 EGFP SDSDSD -cooh

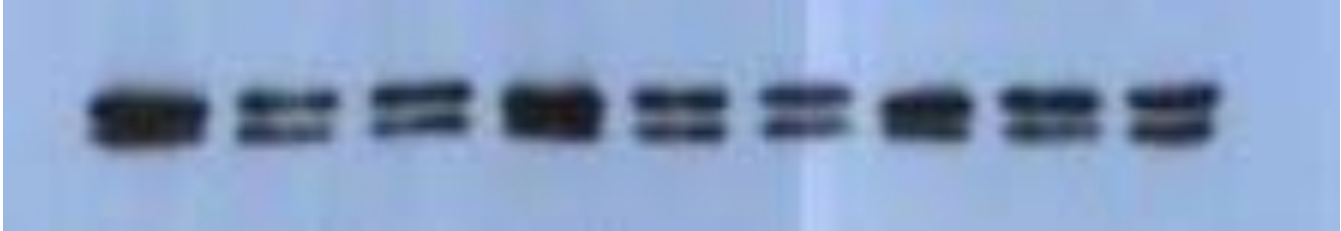

|                             |     |     |     |     |     |     |     |     |     |
|-----------------------------|-----|-----|-----|-----|-----|-----|-----|-----|-----|
| calf-intestinal phosphatase | GFP | SD3 | SD3 | GFP | SD3 | SD3 | GFP | SD3 | SD3 |
|                             |     | +   | -   |     | +   | -   |     | +   | -   |

A c-terminal fusion of a putative *A.thaliana* dehydrin to EGFP.

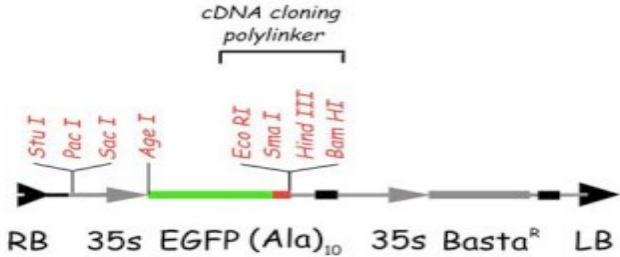

D4      D4-SD2ΔA4

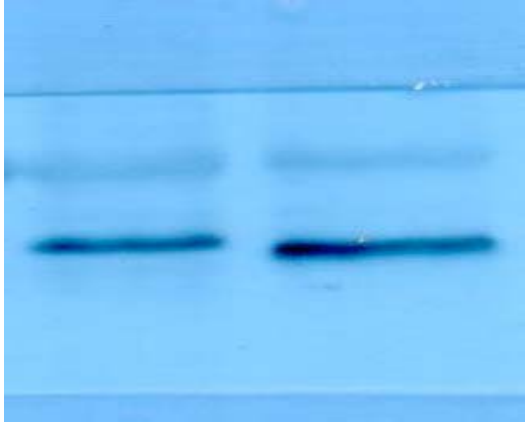

D4      35s [EGFP] [putative dehydrin At1g54410] [-SDSD-cooh]

D4-SD2ΔA4      35s [EGFP] [putative dehydrin At1g54410] [-AAAA-cooh]

D4      D4-SD2ΔA4

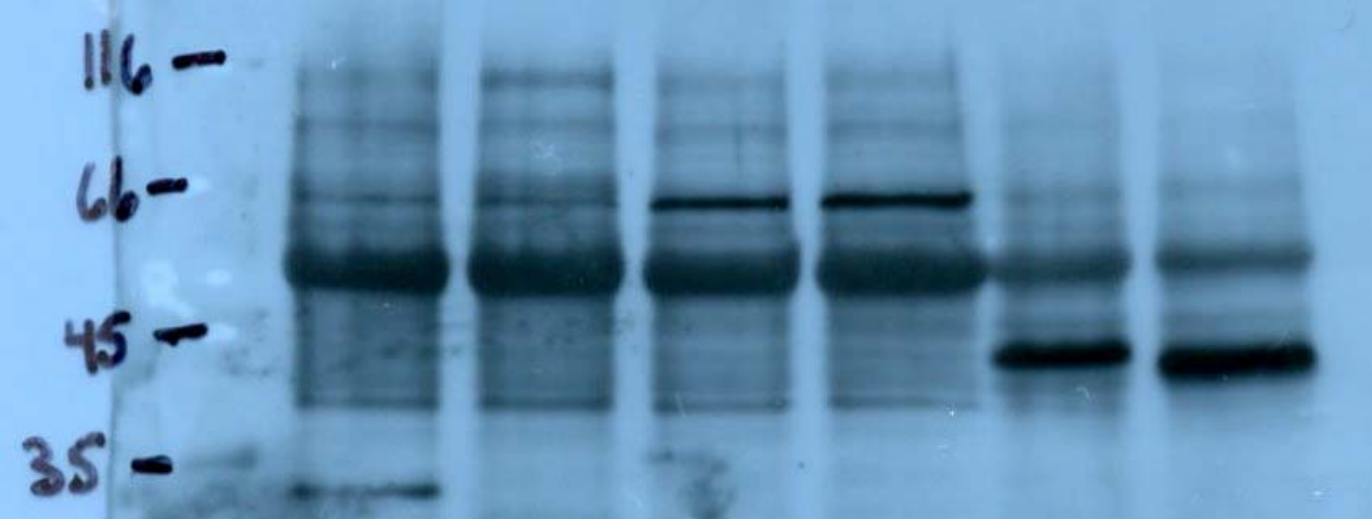

Supplement: 1471-2164-8-191-S4.pdf [file 1471-2164-8-191-S4.pdf]
